## *The Effects of Halothane, Enflurane, and Isoflurane on the Length-Tension Relation of the Isolated Ventricular Papillary Muscle of the Ferret*

Philippe Baele, M.D.,\* Philippe R. Housmans, M.D., Ph.D.†

The effects of halothane, enflurane, and isoflurane on the length-tension relation were investigated in papillary muscles of the right ventricle of adult male ferrets at 30° C. Isometric twitch contractions were obtained at lengths ranging from the shortest length yielding the greatest active force development under isometric conditions ( $L_{\max}$ ) to 86% of  $L_{\max}$ , in two consecutive protocols: first in  $[Ca^{2+}]_0$  ranging from 0.45 to 2.25 mM, and then in  $[Ca^{2+}]_0$  2.25 mM before, during, and after exposure to incremental concentrations of halothane (n = 9 muscles), enflurane (n = 9 muscles), and isoflurane (n = 9 muscles), each in steps of 0.25 MAC to total concentrations up to and including 1.5 MAC. Each of the three anesthetics caused a concentration-dependent decrease in developed force. The relative extent of the negative inotropic effect was not different at various muscle lengths. Because myofibrillar  $Ca^{2+}$  responsiveness ( $Ca^{2+}$ -affinity of troponin C) decreases at shorter muscle lengths, the results suggest that an alteration in myofibrillar  $Ca^{2+}$  responsiveness by volatile anesthetics is minor relative to the anesthetic-induced decreased intracellular  $Ca^{2+}$  availability in ventricular myocardium. (Key words: Anesthetics, volatile: enflurane; halothane; isoflurane. Cardiac muscle: length-tension relation. Heart: Starling's Law; contractility.)

THE DEVELOPMENT OF FORCE by mammalian cardiac muscle and ventricular performance depends on initial fiber length—a phenomenon that is well known as the Frank-Starling Law of the Heart.<sup>1</sup>

Current theories suggest that both mechanical factors, such as myofilament overlap, as well as activation factors, such as the amount of  $Ca^{2+}$  bound to troponin, are affected by muscle length and contribute to the length dependence of force generation. In fully activated frog skeletal muscle, changes in thick and thin filament overlap account for most of the changes in force along the descending limb of the sarcomere length-tension relation, at sarcomere lengths  $>2.25 \mu\text{m}$ ,<sup>2</sup> whereas along the ascending limb (sarcomere length  $<2.0 \mu\text{m}$ ), myofilament overlap, restoring forces, and effects of interference between overlapping ends of thin filaments play a dominant role.

In mammalian cardiac muscle, where the working range is restricted to sarcomere lengths between approximately 1.6 to  $2.3 \mu\text{m}$ ,<sup>3</sup> the slope of the ascending limb of the length-tension relation is much steeper than in skeletal muscle, so that mechanical factors alone cannot account for the length dependence of force generation in cardiac muscle. In maximally calcium-activated skinned cardiac cells<sup>4</sup> and trabeculae,<sup>5</sup> the slope of the ascending limb of the length-tension relation is less steep than in intact cardiac muscle, which is generally only partially activated, so that the reduction of force in intact cardiac muscle at short sarcomere lengths is much greater than can be accounted for by mechanical factors only. This finding was one of the earliest indications that changes in activation with muscle length may also contribute to the cardiac length-tension relation. Two independent mechanisms by which changes in length affect activation have so far been identified. Changes in affinity of troponin for  $Ca^{2+}$  seem to occur instantaneously with changes in length,<sup>5,6</sup> whereas slow changes in  $Ca^{2+}$  release by the sarcoplasmic reticulum (SR) seem to follow changes in muscle length.<sup>7,8</sup>

The volatile anesthetics halothane, enflurane, and isoflurane are well-known myocardial depressants. Negative inotropic effects of these drugs have been explained in terms of their actions in interfering with 1) the entry of  $Ca^{2+}$  through the sarcolemma; 2) the  $Ca^{2+}$  uptake and release from the SR; and 3) the  $Ca^{2+}$  responsiveness of the contractile apparatus.<sup>9</sup> Most previous studies on the cardiac contractile effects of anesthetics were conducted at a fixed initial fiber length. Since both volatile anesthetics and shorter muscles lengths decrease myofibrillar responsiveness, it is possible that the anesthetic negative inotropic effect is more pronounced at long than at short muscle lengths. The purpose of this study is 1) to document the effects of halothane, enflurane, and isoflurane on the length-tension relation of isolated ventricular myocardium; and 2) to test the hypothesis that these anesthetics have a more pronounced negative inotropic effect at long than at short muscle lengths.

### Materials and Methods

This study was approved by the Institutional Animal Care and Use Committee. Twenty-seven papillary muscles

\* Visiting Scientist, Department of Anesthesiology.

† Assistant Professor of Anesthesiology and Pharmacology, Mayo Medical School.

Received from the Mayo Clinic, Rochester, Minnesota. Accepted for publication September 12, 1990. Supported by National Institutes of Health grant GM 36365, the Foundation St.-Luc, Belgium, and the Mayo Foundation.

Address reprint requests to Dr. Housmans: Department of Anesthesiology, Mayo Clinic, Rochester, Minnesota 55905.

from the right ventricle of adult male ferrets (weighing 1,100–1,500 g, and 16–19 weeks of age) were used for this study. The animals were anesthetized with 100 mg/kg intraperitoneal pentobarbital. As soon as a surgical level of anesthesia was reached, the heart was excised quickly and placed in a beaker with freshly oxygenated (30° C) physiologic salt solution. After a few minutes of spontaneous beating, the aorta and coronary arteries were selectively perfused for one minute with oxygenated physiological salt solution at 30° C. The right ventricle was opened and oxygenated physiologic salt solution (30° C) dripped on the exposed right ventricle and papillary muscles, while the heart and papillary muscles were beating spontaneously. Papillary muscles were excised carefully and mounted vertically in a jacketed temperature-controlled (30° C) muscle chamber similar to Blinks<sup>10</sup> bath. The chamber contained 80 ml physiologic salt solution of the following composition (mM): Na<sup>+</sup> 140; K<sup>+</sup> 5; Ca<sup>2+</sup> 2.25; Mg<sup>2+</sup> 1; Cl<sup>-</sup> 103.5; HCO<sub>3</sub><sup>-</sup> 24; HPO<sub>4</sub><sup>2-</sup> 1; SO<sub>4</sub><sup>2-</sup> 1; acetate<sup>-</sup> 20; and glucose 10. This solution was made with deionized distilled water and was continuously bubbled with a gas mixture of 95% O<sub>2</sub>–5% CO<sub>2</sub>.

The tendinous end of each muscle was tied with a thin braided polyester thread (size 9.0 Deknatel® Surgical Tevdek) to the lever of a force–length servo transducer<sup>11</sup> with a moving mass equivalent to 250 mg and a static compliance of 0.28  $\mu\text{m}/\text{mN}$ . The ventricular end of the muscle was held in a miniature Lucite clip with built-in platinum electrode. Two platinum wires ran longitudinally on either side of the muscle and served as anode during punctate stimulation.

All of the experiments of this study were conducted at a stimulus frequency of 0.25 Hz and at a temperature of 30° C to allow for comparison with other studies in ferret papillary muscle.<sup>12,13</sup> Previous experiments, though conducted in isotonic conditions, have shown that ferret isolated papillary muscles remain stable for many hours in those circumstances.<sup>12</sup>

A Grass S88D stimulator delivered rectangular pulses of 5-ms duration, and stimulus voltage was set 10% above threshold and ranged from 2 to 12 volts. After 10 min of preloaded isotonic twitch contractions, the muscles were made to contract in alternating series of four pre-

loaded isotonic and four isometric twitches for at least 2 h, until twitch amplitude and time course reached steady state. During this stabilization period, the bathing solution was renewed at least twice with fresh physiologic salt solution. After the stabilization period, muscle length was set at the shortest muscle length yielding the greatest active force development under isometric conditions ( $L_{\text{max}}$ ), and the basic characteristics were determined. Table 1 shows the basic muscle characteristics at  $L_{\text{max}}$  at the onset of the experiment. Waveforms of force, length, and rate of force development ( $dF/dt$ ) were acquired each at 1 kHz and displayed as a function of time on a four-channel digital oscilloscope (Nicolet 4094A or 4094C) and on a four-channel pen recorder (Honeywell 1400). Waveforms of interest were permanently stored on floppy disks, transferred to a microcomputer (IBM PC-XT, Boca Raton, FL) and analyzed as previously described.<sup>12</sup> At this stage, ten muscles were excluded from the study for failure to meet previously described criteria,<sup>12</sup> which define suitable muscles as having, at  $L_{\text{max}}$ , a length  $\geq 3.5$  mm, a mean cross-sectional area  $\leq 1.2$  mm<sup>2</sup>, and ratio of resting to total force ( $R/T$ )  $< 0.25$ .

After a new stabilization period of 20 min under isometric conditions at  $L_{\text{max}}$ , each of a series of eight isometric contractions was recorded at a different length, in the following sequence: 100, 96, 92, 88, 98, 94, 90, and 86% of  $L_{\text{max}}$ . Changes in muscle length were applied  $203.9 \pm 3.0$  ms (mean  $\pm$  SD) before the stimulus by rapidly ( $< 3$  ms) switching electronically from the stop set at  $L_{\text{max}}$  to the stop at each shorter length. Each of these test contractions at a length shorter than  $L_{\text{max}}$  was separated by 15 isometric contractions at  $L_{\text{max}}$  to minimize the slow effects of length changes on force development.<sup>8</sup> This 8-min sequence of “test contractions” was repeated in the various conditions (*vide infra*) during the experiment. For each contraction the following variables were measured: resting force, total force, developed force (DF), maximal rate of force development ( $+dF/dt_{\text{max}}$ ), maximal rate of decrease in force ( $-dF/dt_{\text{max}}$ ), resting length, length at peak force, time to peak force (TPF), time to maximal rate of force development, time to maximal rate of decrease in force, and time from peak force to half-isometric relaxation ( $RT_{1/2}$ ).

TABLE 1. Muscle Characteristics at the Onset of the Experiments at  $L_{\text{max}}$

|                    | $L_{\text{max}}$ (mm)          | CSA (mm <sup>2</sup> )         | R (mN·mm <sup>-2</sup> )        | T (mN·mm <sup>-2</sup> )           | R/T                                |
|--------------------|--------------------------------|--------------------------------|---------------------------------|------------------------------------|------------------------------------|
| Halothane (n = 9)  | 5.59 $\pm$ 1.46<br>(3.50–7.50) | 0.56 $\pm$ 0.19<br>(0.31–0.88) | 8.76 $\pm$ 3.20<br>(3.07–14.09) | 49.48 $\pm$ 21.32<br>(26.17–92.82) | 0.186 $\pm$ 0.056<br>(0.100–0.263) |
| Enflurane (n = 9)  | 5.26 $\pm$ 1.13<br>(4.00–7.50) | 0.66 $\pm$ 0.23<br>(0.36–0.98) | 8.55 $\pm$ 3.29<br>(4.57–15.37) | 44.64 $\pm$ 18.82<br>(25.61–78.07) | 0.197 $\pm$ 0.041<br>(0.144–0.270) |
| Isoflurane (n = 9) | 4.73 $\pm$ 0.69<br>(3.75–5.75) | 0.61 $\pm$ 0.16<br>(0.33–0.83) | 7.35 $\pm$ 3.67<br>(3.83–15.87) | 44.29 $\pm$ 12.60<br>(27.37–65.00) | 0.161 $\pm$ 0.041<br>(0.117–0.244) |

Values are mean  $\pm$  SD; range in parentheses.

CSA = cross-sectional area; R = resting tension; T = total tension.

TABLE 2. Control Values of  $L_{\max}$

|                   | DF<br>(mN · mm <sup>-2</sup> ) | +dF/dt <sub>max</sub><br>(mN · mm <sup>-2</sup> · s <sup>-1</sup> ) | -dF/dt <sub>max</sub><br>(mN · mm <sup>-2</sup> · s <sup>-1</sup> ) | TPF<br>(ms)        | RT½<br>(ms)        |
|-------------------|--------------------------------|---------------------------------------------------------------------|---------------------------------------------------------------------|--------------------|--------------------|
| <b>Halothane</b>  |                                |                                                                     |                                                                     |                    |                    |
| 1                 | 40.758 ± 20.002                | 332.049 ± 139.112                                                   | 274.377 ± 76.090                                                    | 214.750 ± 36.441   | 129.250 ± 49.552   |
| 2                 | 33.825 ± 18.668**              | 286.411 ± 131.803**                                                 | 238.770 ± 97.585*                                                   | 203.875 ± 28.287   | 118.500 ± 42.440*  |
| 3                 | 40.522 ± 19.791                | 342.436 ± 135.823                                                   | 272.182 ± 94.562                                                    | 205.222 ± 30.145   | 116.125 ± 30.187   |
| 4                 | 36.205 ± 17.988†               | 302.808 ± 135.167†                                                  | 242.895 ± 103.950                                                   | 208.444 ± 35.739   | 119.875 ± 32.211   |
| <b>Enflurane</b>  |                                |                                                                     |                                                                     |                    |                    |
| 1                 | 36.772 ± 15.933                | 265.708 ± 105.825                                                   | 194.575 ± 71.968                                                    | 225.625 ± 25.939   | 136.000 ± 21.153   |
| 2                 | 28.488 ± 12.612**              | 238.905 ± 96.995*                                                   | 185.173 ± 71.706                                                    | 216.500 ± 28.671*  | 123.875 ± 15.624** |
| 3                 | 36.132 ± 17.422                | 323.858 ± 177.517                                                   | 236.449 ± 120.169                                                   | 207.444 ± 29.134   | 121.222 ± 19.182   |
| 4                 | 32.304 ± 15.992                | 281.957 ± 157.737                                                   | 200.570 ± 97.790†                                                   | 213.778 ± 26.541   | 123.444 ± 17.536   |
| <b>Isoflurane</b> |                                |                                                                     |                                                                     |                    |                    |
| 1                 | 37.540 ± 9.448                 | 301.152 ± 63.996                                                    | 240.524 ± 72.719                                                    | 218.444 ± 17.565   | 131.000 ± 23.281   |
| 2                 | 31.590 ± 9.879**               | 269.781 ± 67.977*                                                   | 226.123 ± 73.511                                                    | 208.222 ± 17.845** | 120.111 ± 13.495** |
| 3                 | 36.287 ± 9.536                 | 312.117 ± 74.004                                                    | 263.691 ± 77.197                                                    | 205.333 ± 15.572   | 115.778 ± 16.200   |
| 4                 | 32.016 ± 10.108†               | 268.936 ± 83.389††                                                  | 216.363 ± 70.802††                                                  | 211.778 ± 20.987†  | 124.889 ± 14.632†† |

Values are mean ± SD.

DF = developed force; +dF/dt<sub>max</sub> = maximal rate of rise of force; -dF/dt<sub>max</sub> = maximal rate of fall of force; TPF = time to peak force; RT½ = time from peak force to half isometric relaxation.

\*  $P < 0.05$ , \*\* $P < 0.01$  for comparison with control 1 by Student's paired  $t$  test. † $P < 0.05$ , †† $P < 0.01$  for comparison with control 3 by Student's paired  $t$  test.

Once the initial series of test contractions had been recorded (control 1, table 2, fig. 1) the solution was changed to a low- $[Ca^{2+}]_o$  (0.45 mM) solution, and muscles were allowed to reach steady state. Series of test contractions were recorded after a 15-min equilibration, at each of the following  $Ca^{2+}$  concentrations (mM): 0.45, 0.90, 1.35, 1.80, and 2.25 (control 2, table 2), achieved by addition of small aliquots of a  $CaCl_2$  (112.5 mM) solution to the bath. The solution then was replaced with fresh physiologic salt solution ( $[Ca^{2+}]_o$  2.25 mM), and muscles were allowed to equilibrate. A third series of test contractions then was recorded (control 3, table 2) immediately before exposure to anesthetic. Each muscle was exposed to one anesthetic only, and nine muscles were tested for each anesthetic. Following MAC values previously determined for the ferret at 37° C,<sup>14</sup> we studied the effects of equipotent concentrations of halothane, enflurane, and isoflurane from 0–1.50 MAC in 0.25 MAC increments. Since the experiments were carried out at 30° C, however, the MAC fractions and multiples used (derived at 37° C) were in fact greater than the 0–1.5 MAC values, by approximately 16%. Sixty minutes after anesthetic delivery to the bathing solution was terminated, a final set of control contractions was recorded (control 4, table 2).

The concentration of anesthetic was measured continuously between the reservoir bag and the roller pump with a calibrated fast-response acoustic gas analyzer.<sup>12</sup> This device was calibrated with 100% O<sub>2</sub> and 100% N<sub>2</sub>O immediately before the first concentration of anesthetic was tested, and the calibration was corrected for the presence of 5% CO<sub>2</sub> in the carrier gas.

At each anesthetic concentration, stable values of DF were reached usually after 20–35 min. Test contractions then were recorded, such that total exposure at each anesthetic concentration was 30–45 min. After test contractions had been recorded at 1.50 MAC, the vaporizer was turned off, the reservoir bag emptied, and the muscles allowed to recover for 1 h. A final set of test contractions (control 4, fig. 1) then was recorded; at the conclusion of the experiment the muscles were weighed after very light blotting. The duration of the experiments, measured from the commencement of the measurements, was 456 ± 84 min (mean ± SD) with a range of 300–624 min.

## STATISTICAL ANALYSIS

For each muscle and at each experimental step, the relationship between muscle length and the following

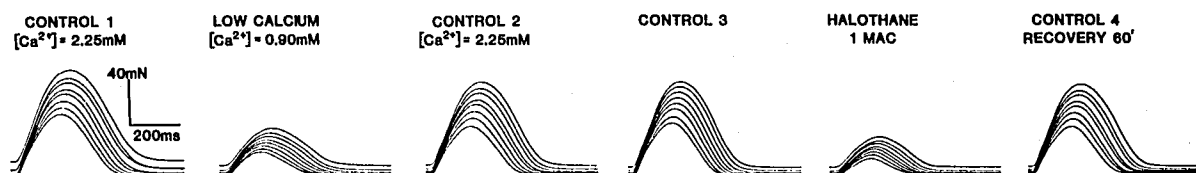

FIG. 1. Each of the six panels represents the time course of force of isometric twitches at lengths from 100 to 86% of  $L_{\max}$  at 2%  $L_{\max}$  intervals in different conditions (see text). The superimposed force traces in each panel represent twitches recorded at different lengths.

variables were studied: DF, maximum positive  $dF/dt$  ( $+dF/dt_{\max}$ ), maximum negative  $dF/dt$  ( $-dF/dt_{\max}$ ), TPF, and  $RT_{1/2}$ . Least-squares linear regression analysis was carried out between each variable and muscle length, expressed as percent of  $L_{\max}$ . Values of slopes were tested for differences between anesthetic agent groups with one-way analysis of variance (ANOVA), at corresponding anesthetic concentrations.

Least-squares linear regression analysis also was carried out between each variable and anesthetic concentration expressed as fraction or multiple of MAC. Values of slope were tested for differences between anesthetic agent groups with one-way ANOVA at each resting length. Student's  $t$  tests were used to compare two groups when appropriate.

At each length, the value of each variable at a given anesthetic concentration was computed as a percent of its value in control conditions at that length. Linear regression analysis was carried out between these percent values and length. Values of slope were tested for difference from zero for each anesthetic concentration. The same steps were followed for the low- $[Ca^{2+}]_o$  study, with  $[Ca^{2+}]_o$  expressed as  $\log [Ca^{2+}]_o$ .

The time variables of the isometric twitch—TPF and  $RT_{1/2}$ —were displayed as a function of peak DF for each group of muscles at each length. Within each group, least-squares linear regression through individual (time and amplitude) values yielded sets of (slope and intercept) values for each muscle for change in  $[Ca^{2+}]_o$  and in anesthetic concentration. Within each group of muscles, we tested for statistically significant differences in (slope and intercept) values between the  $[Ca^{2+}]_o$  and anesthetic concentration data with Hotelling's  $T^2$  test.<sup>15</sup>

## Results

### ANESTHETIC EXPERIMENTS

When muscle length was decreased from  $L_{\max}$ , there consistently was a decrease in DF in control conditions, in low  $[Ca^{2+}]_o$ , and in the presence of anesthetic (fig. 2). The slope of the DF-length relationship was computed for each muscle in each tested condition. When computed from absolute values of DF, the slopes of the DF-length relationship already were significantly different from control at 0.25 MAC (Student's paired  $t$  test,  $P < 0.01$ ) for each of the three tested anesthetics (fig. 3, top). The difference between control and anesthetic became more pronounced at higher concentrations ( $P < 0.001$  at  $\geq 0.50$  MAC). Values of slopes before and after the anesthetic concentration-effect experiment were not statistically significantly different ( $P > 0.05$ ).

There were no differences between DF-length slopes among anesthetic groups ( $P = 0.16$ , one-way ANOVA).

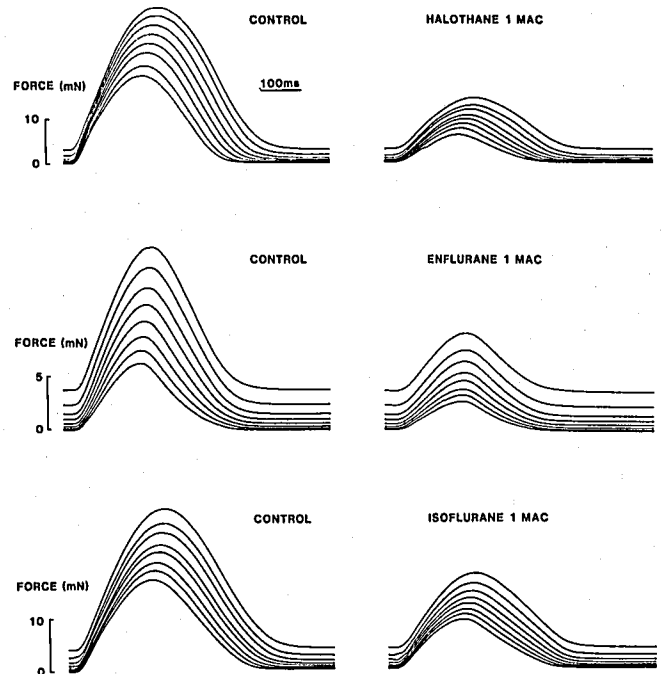

FIG. 2. Time course of force development in isometric twitches at lengths from 100 to 86% in each of three muscles: control and 1 MAC halothane (top); control and 1 MAC enflurane (middle); control and 1 MAC isoflurane (bottom). The superimposed force tracings in each panel represent twitches recorded at different lengths.

DF then was plotted as a percent value of DF at  $L_{\max}$  for each anesthetic concentration (fig. 3, middle). This plot showed that at high anesthetic concentrations (1.50 MAC), muscles often performed optimally at lengths shorter than  $L_{\max}$ , typically 98% of  $L_{\max}$ . This effect was reversible upon discontinuing the anesthetic and happened more often and in a more pronounced way with enflurane and halothane than with isoflurane. Substituting the new  $L_{\max}$  for the initial one when appropriate did not affect the overall results of the study. The bottom part of figure 3 displays, for each length, how DF compared with its length-matched control before the anesthetic was applied. The slopes of the relationship between relative values  $DF_{\text{anes}}/DF_{\text{control}}$  and length did not differ significantly from zero. In other words, if a given anesthetic concentration decreased DF in a certain proportion at one length, it did so in the same proportion at any other length.

Also in every muscle, DF decreased in a dose-dependent fashion during anesthetic exposure at every tested length (fig. 2 and fig. 4, top). At  $L_{\max}$ , 1.50 MAC isoflurane reduced DF to (mean  $\pm$  SD)  $30.90 \pm 7.52\%$  of its original value; 1.50 MAC enflurane to  $17.41 \pm 9.73\%$ ; and 1.50 MAC halothane to  $18.77 \pm 8.59\%$ . The effect of the anesthetic may be characterized by the relationship between the slope of DF and anesthetic concentration (MAC),

FIG. 3. (Top) Relationships of developed force (DF) of isometric twitches at different lengths (force-length relation) before and during exposure to incremental concentrations of isoflurane ( $n = 9$ ), enflurane ( $n = 9$ ), or halothane ( $n = 9$ ). Data are mean  $\pm$  SD. For clarity, error bars are shown only for control and 1.5 MAC anesthetic. (Middle) Same as top, except that DF values are shown as percent of DF at  $L_{max}$ . (Bottom) Same as top, except that DF values are shown as percent of DF at each corresponding length.

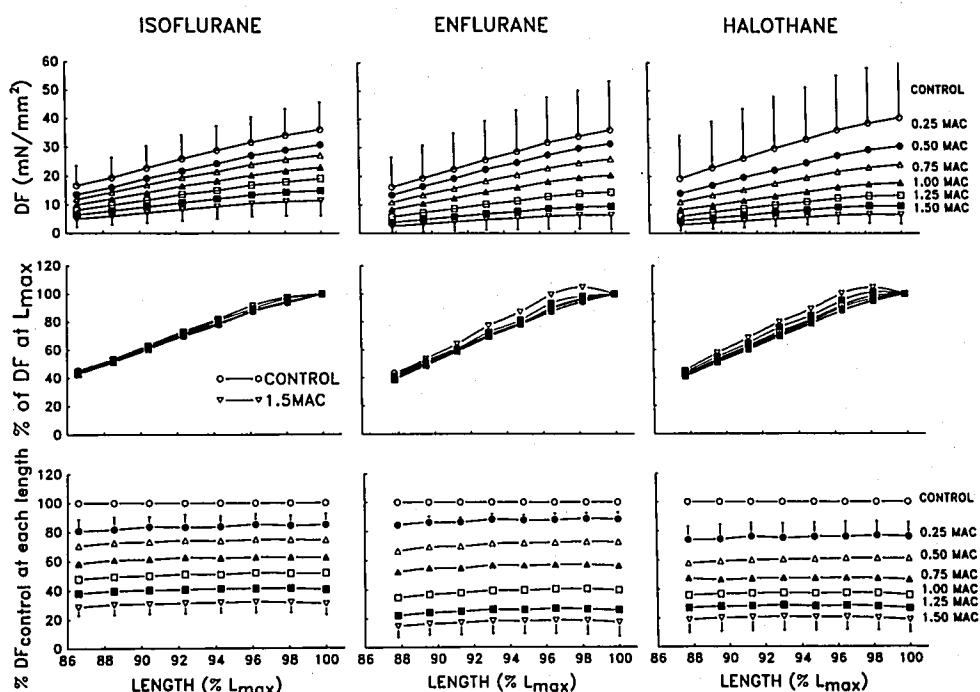

which was plotted for  $L_{max}$  and 86%  $L_{max}$  (fig. 4). These slopes vary with length according to the effect of length change on the absolute value of DF (fig. 5, top). There were no differences among anesthetics in their actions on the DF-length relationship when studied by comparing the slopes of DF  $\neq$  MAC at varying lengths.

The same steps were followed to analyze the changes of other variables during the experiments. We will now consider separately the positive and negative rates of force change ( $+dF/dt_{max}$  and  $-dF/dt_{max}$ , respectively) and time variables for force development and relaxation (TPF and  $RT_{1/2}$ ).

FIG. 4. (Top) Cumulative dose-response relationships of developed force (DF; mean  $\pm$  SEM) in isometric twitches to isoflurane, enflurane, and halothane at  $L_{max}$  (left) and 86%  $L_{max}$  (right), with corresponding least-squares linear regression lines. (Bottom) Dose-response relationship of DF to  $[Ca^{2+}]_0$  at  $L_{max}$  (left) and 86% of  $L_{max}$  (right), with superimposed least-squares linear regression lines.

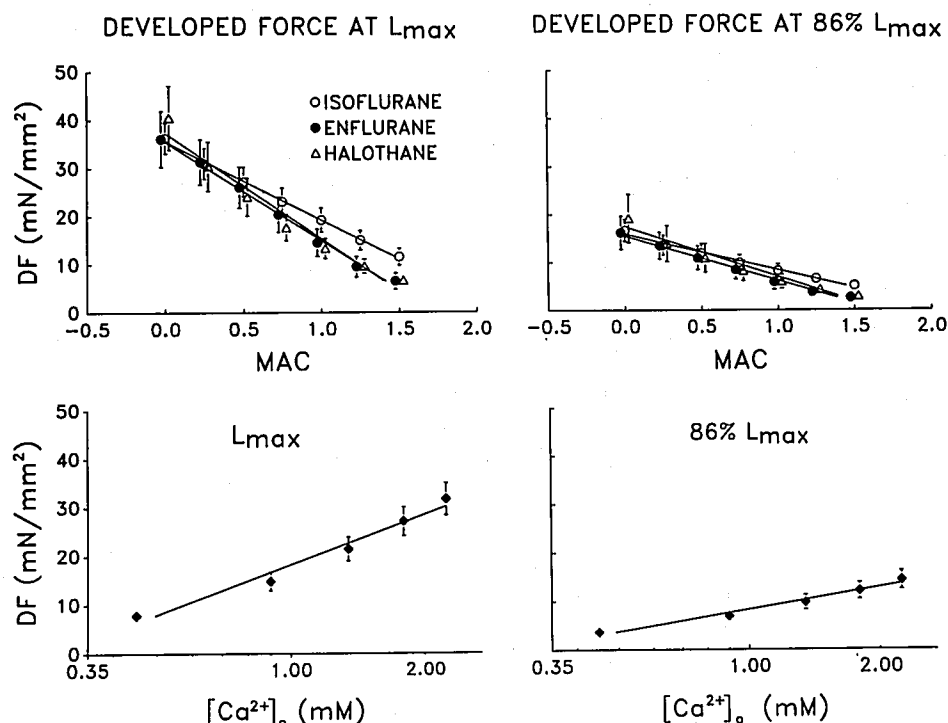

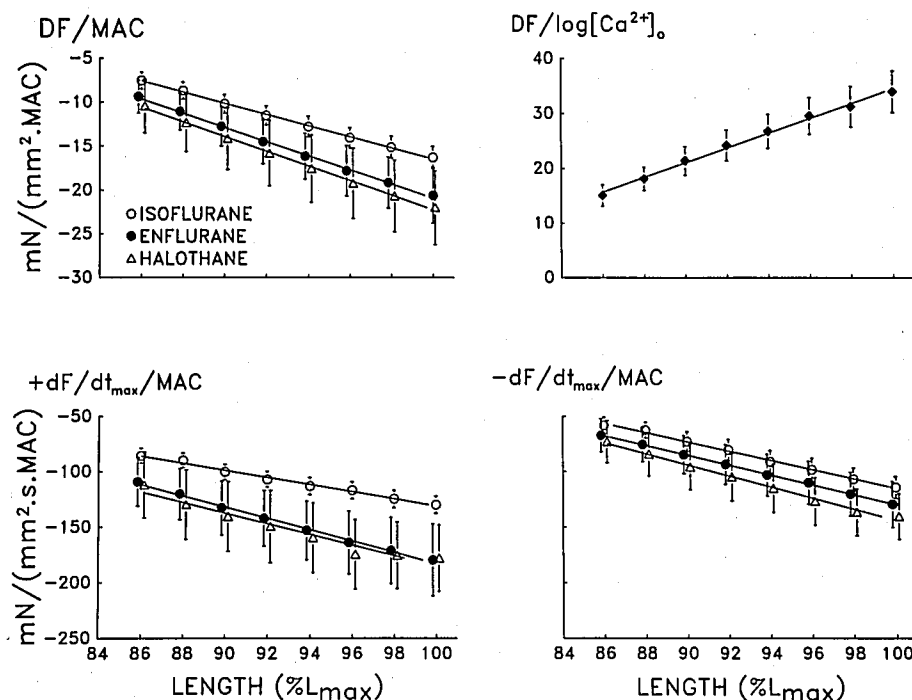

FIG. 5. Length dependence of  $DF/MAC$ ,  $+dF/dt_{max}/MAC$ , and  $-dF/dt_{max}/MAC$  for isoflurane, enflurane and halothane, and of  $DF/\log [Ca^{2+}]_0$ . Data are mean  $\pm$  SEM ( $n = 9$  per group), with superimposed least-squares linear regression lines.

Before anesthetics were applied,  $+dF/dt_{max}$  and  $-dF/dt_{max}$  decreased to approximately 55% of the value at  $L_{max}$  when length was decreased to 86% of  $L_{max}$ , similar to a decrease in  $DF$  to 44% of  $L_{max}$  values. The slopes of the  $+dF/dt_{max}$ -length and  $-dF/dt_{max}$ -length relationships became significantly different from control at 0.25 MAC halothane ( $P < 0.01$ ) for  $+dF/dt_{max}$  and  $-dF/dt_{max}$ ; at 0.25 MAC enflurane for  $-dF/dt_{max}$  ( $P < 0.05$ ) and at 0.5 MAC for  $+dF/dt_{max}$  ( $P < 0.05$ ); at 1.0 MAC isoflurane ( $P < 0.05$ ) for  $-dF/dt_{max}$  and at 0.50 MAC for  $+dF/dt_{max}$  ( $P < 0.01$ ). There were significant differences between anesthetic groups for  $+dF/dt_{max}$ , but not for  $-dF/dt_{max}$ . Halothane decreased  $+dF/dt_{max}$  more at any length than did isoflurane ( $P = 0.0009$ ) or enflurane ( $P = 0.0022$ ). The slopes of the relationship of percent values of  $+dF/dt_{max, anes}/+dF/dt_{max, control}$  and  $-dF/dt_{max, anes}/-dF/dt_{max, control}$  versus length did not differ significantly from zero. The slopes of the relationship between  $+dF/dt_{max}/MAC$  and length were different between anesthetic groups ( $P = 0.0002$ , one-way ANOVA; halothane *vs.* enflurane,  $P = 0.002$ ; halothane *vs.* isoflurane,  $P = 0.0009$ ; enflurane *vs.* isoflurane,  $P = 0.02$ ; fig. 5, bottom left). At 1.5 MAC halothane and enflurane, maximal  $+dF/dt_{max}$  and  $-dF/dt_{max}$  values were found at 98% of  $L_{max}$ .

$RT_{1/2}$  decreased to approximately 75–80% of control when length was decreased from  $L_{max}$  to 86% of  $L_{max}$ . At  $L_{max}$ , isoflurane, enflurane, and halothane at 1.5 MAC reduced  $RT_{1/2}$  to  $85.48 \pm 8.98$ ,  $79.24 \pm 11.08$ , and  $80.64 \pm 11.75\%$  of preanesthetic values, respectively.

The slopes of the relationship of percent values of  $RT_{1/2, anes}/RT_{1/2, control}$  versus length did not differ from zero.

The slopes of the relationship between  $RT_{1/2}/MAC$  and length differed between halothane and isoflurane ( $P = 0.0068$ , one-way ANOVA; halothane *vs.* isoflurane,  $P = 0.01$ ; fig. 6, top right). Finally, at 1.5 MAC halothane and enflurane, maximal values of  $RT_{1/2}$  were found at 98% of  $L_{max}$ .

TPF decreased little (typically to 80–85% of control) when length decreased from  $L_{max}$  to 86% of  $L_{max}$ . The slopes of TPF-length relationships became significantly different from their corresponding control at 0.25 MAC halothane, 0.75 MAC enflurane, and 1.0 MAC isoflurane. The differences between groups were highly significant ( $P < 0.0001$ , one-way ANOVA; halothane *vs.* enflurane  $P = 0.0003$ ; halothane *vs.* isoflurane  $P = 0.0001$ ; enflurane *vs.* isoflurane  $P = 0.01$ ). The slopes of the relationship of percent values of  $TPF_{anes}/TPF_{control}$  versus length changed with increasing anesthetic concentrations. They became significantly different (from the slope before anesthetic) at 0.75 MAC for isoflurane ( $P < 0.05$ ), at 1.25 MAC for enflurane ( $P < 0.01$ ), and at 0.5 MAC for halothane ( $P < 0.01$ ).

The slopes of the  $TPF \neq MAC$  versus length relationship were different between the halothane and isoflurane groups between 96% and 86% of  $L_{max}$ . Differences between enflurane and halothane groups reached statistical significance only at 92% of  $L_{max}$  and at  $L_{max}$  (fig. 6, top left).

#### CALCIUM EXPERIMENTS

The effects of low extracellular  $Ca^{2+}$  concentrations were tested in eight muscles of the halothane group, eight

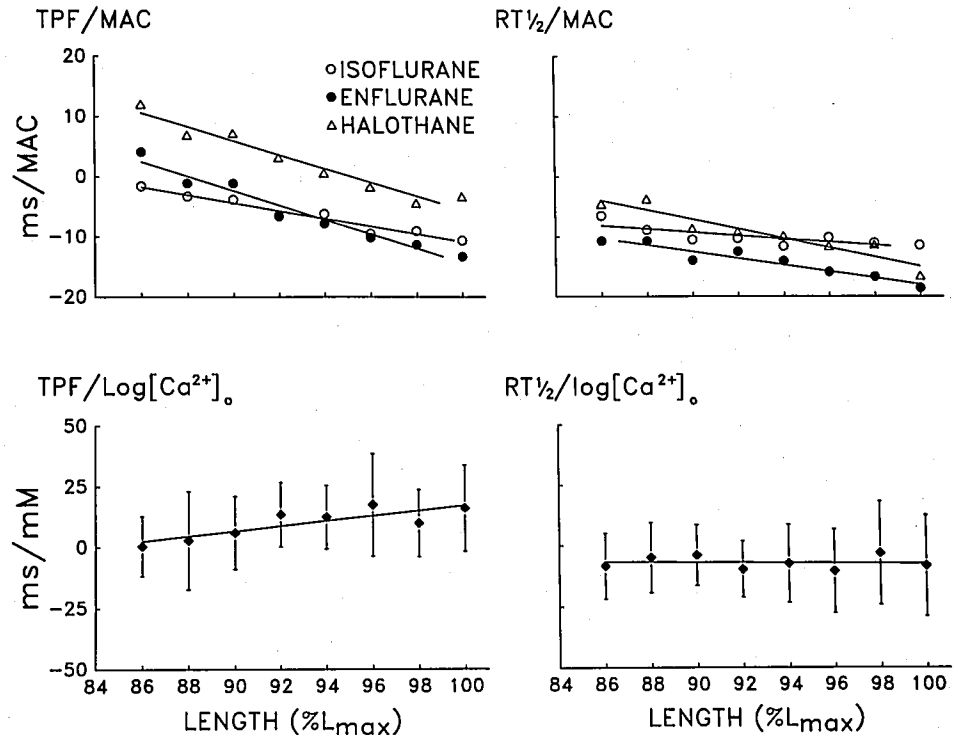

FIG. 6. Length dependence of slopes of linear regression lines relating TPF and  $RT_{1/2}$  to MAC (top) and to  $\log [Ca^{2+}]_0$  (bottom) in each of the experimental groups. For clarity, SD values are not shown in the top panels; values in lower panels are mean  $\pm$  SD. Least-squares linear regression lines are superimposed.

of the enflurane group, and nine of the isoflurane group. Data from the latter group are shown in figures 4–7. For each muscle, the low  $[Ca^{2+}]_0$  experiment was carried out before the anesthetic experiment.

Decreasing  $[Ca^{2+}]_0$  reduced DF at all lengths (fig. 1 and 4, bottom), whereas decreasing resting length reduced DF at any  $[Ca^{2+}]_0$  (fig. 7). DF at a  $[Ca^{2+}]_0$  of 0.45 mM was  $25.14 \pm 6.67\%$  of control for the isoflurane group ( $n = 9$ ),  $31.21 \pm 12.27\%$  for the enflurane group ( $n = 8$ ), and  $32.41 \pm 8.80\%$  for the halothane group ( $n = 8$ ).  $+dF/dt_{max}$  and  $-dF/dt_{max}$  also were reduced at low  $Ca^{2+}$  concentrations in the same proportions. TPF and  $RT_{1/2}$  did not decrease at low  $[Ca^{2+}]_0$ , and therefore the slopes of the relationship of these variables to  $\log [Ca^{2+}]_0$  was not significantly altered with length (fig. 6, bottom), in contrast to the result with anesthetics (fig. 6, top). The slopes of relative values of variables (*i.e.*, variables at a tested  $[Ca^{2+}]_0 \div$  variables at a  $[Ca^{2+}]_0$  of 2.25 mM) *versus* length never were different from zero, for any variable or at any tested  $[Ca^{2+}]_0$ . In these three series of experiments, decreasing  $Ca^{2+}$  concentration in the bath did not change these variable-length relationships significantly. The three series of experiments also were tested for consistency. The effect of  $\log [Ca^{2+}]_0$  on the different variables was not statistically different between groups, at all lengths.

However, when absolute values of time course variables (TPF and  $RT_{1/2}$ ) were plotted as a function of peak twitch

amplitude (DF) both for changes in  $[Ca^{2+}]_0$  and for anesthetic concentration in isometric twitches at  $L_{max}$  (Fig. 8, left),  $RT_{1/2}$  was lower. In other words, isometric relaxation was abbreviated by anesthetic when compared with that in low  $[Ca^{2+}]_0$  at equal twitch amplitude, whereas at shorter muscle lengths (86%  $L_{max}$ ) there was no difference between low  $[Ca^{2+}]_0$  and anesthetic in the time course of isometric relaxation (Fig. 8, right). There were no statistically significant differences in TPF between anesthetic and low  $[Ca^{2+}]_0$  at either long ( $L_{max}$ ) (except for enflurane) or short (86%  $L_{max}$ ) lengths.  $RT_{1/2}$  was significantly smaller at  $L_{max}$  in the halothane group, at  $L_{max}$ , 98% and 96% of  $L_{max}$  in the enflurane group, and at  $L_{max}$  down to and including 90%  $L_{max}$  in the isoflurane group.

Finally, all changes reported in the anesthetic and calcium experiments were reversible after return to control conditions. There was a significant decrease in DF between controls 1 and 2 ( $P < 0.05$ , paired *t* test) and between controls 3 and 4 ( $P < 0.05$ , paired *t* test). Yet the decreases in DF from control 1 to control 2 and from control 3 to control 4 respectively were not statistically different among the three muscle groups ( $P > 0.05$ , one-way ANOVA).

## Discussion

This study demonstrates that the increase of force with increasing myocardial fiber lengths persists under clinically relevant concentrations of halothane, enflurane, and

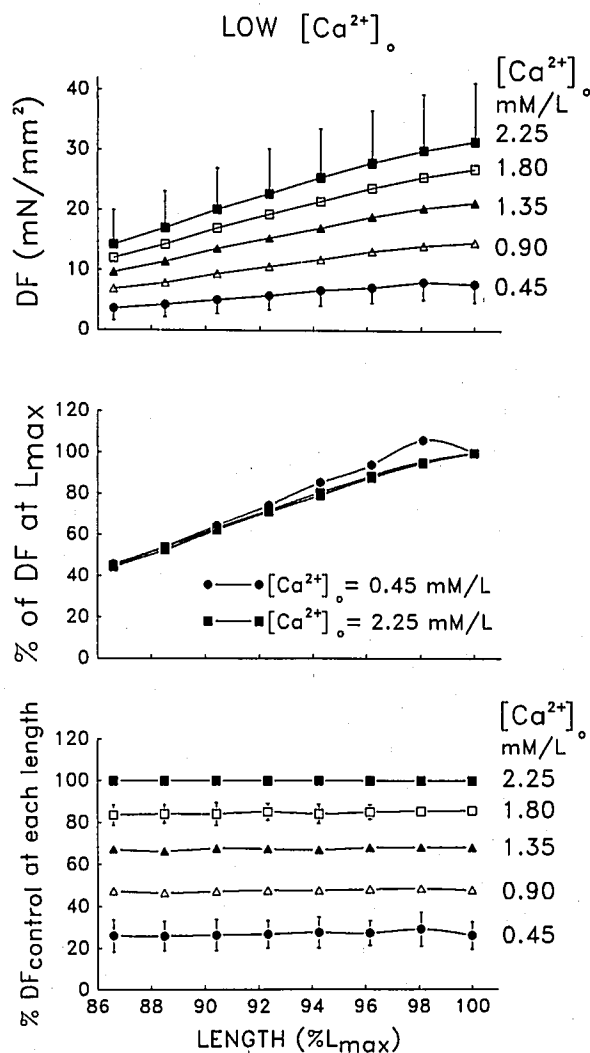

FIG. 7. Force-length relations during isometric twitches during cumulative dose-response experiments to changes in  $[Ca^{2+}]_0$  (mean  $\pm$  SD;  $n = 9$ ; isoflurane group of muscles). Format is the same as in figure 3.

isoflurane. Despite the severe reduction in force developed under isometric conditions when the muscles were exposed to high concentrations of volatile anesthetics, the effect was consistently demonstrated at every concentration of anesthetic and in every muscle tested.

A fundamental property of cardiac muscle is the dependence of force development on muscle length, a property classically known as Starling's Law of the Heart (for a recent review, see ref. 1). Our understanding of the cellular mechanisms that account for the length dependence of force generation is still incomplete, but current theories suggest that both mechanical factors—such as myofilament overlap, intracellular and extracellular restoring forces—and activation factors are affected by muscle length and contribute to the length dependence of force generation.

In fully activated frog skeletal muscle, changes in thick and thin filament overlap account for most of the changes in force along the descending limb of the sarcomere length-tension relationship, at sarcomere lengths  $>2.25 \mu m$ ,<sup>2</sup> whereas along the ascending limb (sarcomere length  $<2.0 \mu m$ ), myofilament overlap, restoring forces, and effects of interference between overlapping ends of thin filaments play a dominant role. In mammalian cardiac muscle, where the working range is restricted to sarcomere lengths between 1.6 to  $2.3 \mu m$ ,<sup>3</sup> mechanical factors alone cannot account for the length dependence of force generation along the ascending limb of the length-tension relationship, the slope of which is much steeper than in skeletal muscle. In maximally calcium-activated skinned cardiac cells<sup>4</sup> and trabeculae,<sup>5</sup> the slope of the ascending limb of the length-tension relation is less steep than in intact cardiac muscle, which is generally only partially activated, so that the decrease in force at short sarcomere lengths in intact cardiac muscle is much greater than can be accounted for by mechanical factors alone. At least two independent mechanisms by which changes in length affect activation have so far been identified: these are changes in affinity of troponin for  $Ca^{2+}$  and slow changes in  $Ca^{2+}$  release by the SR, as discussed in detail below.

After a decrease in length during diastole in cardiac muscle, force is decreased in the next isometric twitch. In subsequent contractions, the twitch amplitude decreases slowly over 5–20 min. The immediate decrease in force after a decrease in length is accompanied by minimal changes<sup>7</sup> or even a slight increase in amplitude<sup>16</sup> of the intracellular  $Ca^{2+}$  transient. The declining phase of the calcium transient is prolonged, whereas the contraction is abbreviated. These observations have led to suggestion that the affinity of troponin for  $Ca^{2+}$  is decreased at short lengths. During the slow decline in force after a shortening step, force and  $[Ca^{2+}]_i$  decreased in parallel, suggesting that the slow component may be due to SR  $Ca^{2+}$  release or  $Ca^{2+}$  entry.<sup>7</sup> Nichols<sup>17</sup> and Allen *et al.*<sup>18</sup> showed that the slow effects are a consequence of muscle length during diastole rather than during systole. They proposed that resting  $[Ca^{2+}]_i$  decreases at short lengths, which results in reduced SR  $Ca^{2+}$  loading and hence reduced  $Ca^{2+}$  release, smaller  $Ca^{2+}$  transients, and reduced force development.

In support of the hypothesis of a decrease in the affinity of troponin C for  $Ca^{2+}$  at short lengths are the observations that in skinned rat cardiac fibers,<sup>6</sup> the steady-state force- $pCa$  curve was shifted toward higher  $[Ca^{2+}]$  at shorter lengths. Furthermore, when native cardiac troponin C was substituted with skeletal troponin C in skinned hamster ventricular trabeculae, most of the length-dependent force generation was lost.<sup>19</sup> Although the exact mechanism by which troponin C senses length changes is unknown, there is evidence that length *per se*



FIG. 8. Dependence of time to peak force (TPF) and of time to half-isometric relaxation ( $RT_{1/2}$ ) on peak developed force in isometric twitches at  $L_{max}$  (left) and at 86%  $L_{max}$  (right) in two different conditions: changes in  $[Ca^{2+}]_0$  from 0.45 to 2.25 mM in 0.45 mM increments (open circles) and of anesthetic concentration from 0 to 1.5 MAC in 0.25 MAC increments (filled circles) in  $[Ca^{2+}]_0$  2.25 mM. Values (mean  $\pm$  SEM) in a given graph are from the same group of muscles ( $n = 9$ ); for each of the two conditions, the three graphs represent experiments on three different groups of muscles. Levels of significance by Hotelling's  $T^2$  test for differences between (slope, intercept) values of least-squares linear regressions among  $[Ca^{2+}]_0$  and [anesthetic] experiments are indicated for TPF and  $RT_{1/2}$  in each panel.

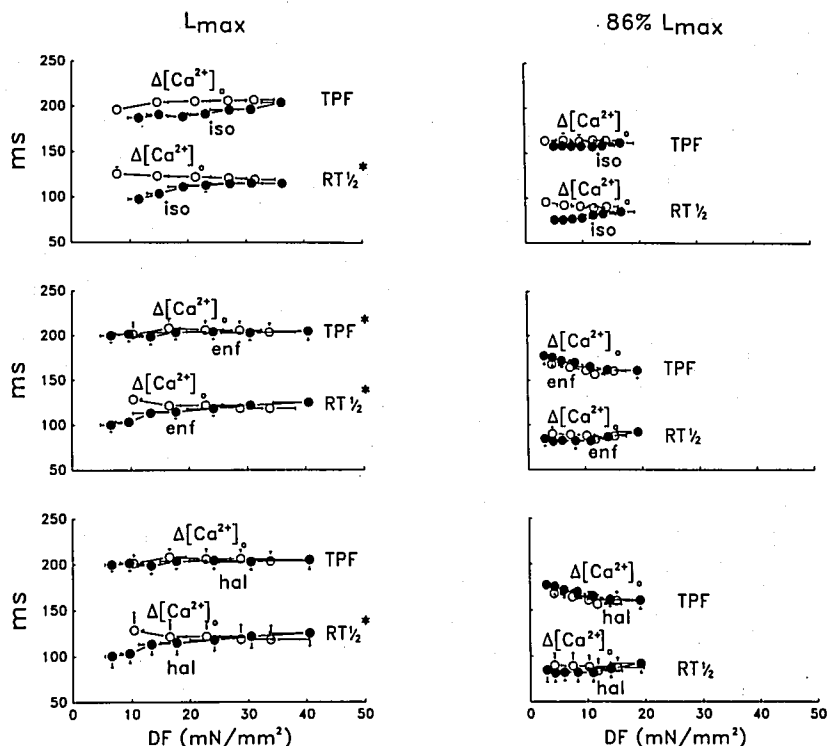

may not be the primary determinant. Force development increases the  $Ca^{2+}$  affinity of troponin C,<sup>1,20,21</sup> and the influence of fiber length on the intracellular  $Ca^{2+}$  transient is attenuated when force development is decreased by application of hypertonic solutions, by substitution of  $D_2O$  for  $H_2O$ , or by 2,3-butanedione 2-monoxime, all of which interfere with cross-bridge attachment.<sup>22</sup> These observations have raised the possibility that fiber length *per se* has no influence on the  $Ca^{2+}$  affinity of troponin C in resting muscle, but that the changes observed are secondary to cross-bridge attachment.<sup>22</sup>

Still uncertain is the extent to which a change in length alters  $Ca^{2+}$  release from the SR and  $Ca^{2+}$  entry across the sarcolemma. On the basis of results from studies in skinned cardiac cells,<sup>4,23</sup> Fabiato and Fabiato suggested that  $Ca^{2+}$  loading of the SR was not affected by length, but that the effectiveness of  $Ca^{2+}$  as a trigger for  $Ca^{2+}$ -induced  $Ca^{2+}$  release was altered by stretch. Yet, from further studies, Fabiato<sup>24</sup> concluded that there is no evidence that calcium-induced release of calcium from the cardiac SR is length-dependent.

Halothane, enflurane, and isoflurane are well-known myocardial depressants. Negative inotropic effects of these drugs have been explained in terms of their actions in interfering with 1) the entry of  $Ca^{2+}$  through the sarcolemma; 2) the  $Ca^{2+}$  uptake and release from the SR; and 3) the  $Ca^{2+}$  responsiveness of the contractile apparatus.<sup>9</sup> In previous studies<sup>12,13</sup> we postulated that halothane, enflurane, and isoflurane, in addition to their effects to re-

duce intracellular calcium availability, decreased myofibrillar  $Ca^{2+}$  responsiveness, by decreasing the affinity of troponin C for  $Ca^{2+}$  and/or by affecting cross-bridge kinetics. More recently, we proposed that the anesthetic-induced changes in myofibrillar  $Ca^{2+}$  responsiveness are small relative to decreases in intracellular  $Ca^{2+}$  availability.<sup>25</sup> In rabbit papillary muscle in  $Ba^{2+}$  contracture, halothane, enflurane, and isoflurane did not alter the frequency of sinusoidal length and force oscillations at which dynamic stiffness was minimal<sup>26</sup>; this observation was taken as evidence that these anesthetics did not alter actin-myosin adenosine triphosphatase (ATPase) kinetics in those conditions. The anesthetic-induced decrease of the high-frequency stiffness in  $Ba^{2+}$  contracture was proposed to reflect a decrease in the number of cross-bridge interactions. In skinned rat cardiac fibers, Murat *et al.*<sup>27</sup> found that clinically relevant concentrations of halothane, enflurane, and isoflurane decreased myofibrillar calcium sensitivity and decreased maximal activated force. The mechanism for these changes was proposed to involve an anesthetic-induced decrease in the number of force-generating cross-bridges, a decrease in force developed by each cross-bridge, and a decrease in the rate of ATP hydrolysis.<sup>28</sup> Yet, since the changes observed were small at relatively high anesthetic concentrations (2 MAC), they probably contribute only to a minor extent to the overall negative inotropic effect of these anesthetics.

In view of the evidence for a length- or force-dependent change in  $Ca^{2+}$  responsiveness and for a decrease in myo-

fibrillar  $\text{Ca}^{2+}$  responsiveness by volatile anesthetics, one would predict that the relative negative inotropic effect of volatile anesthetics would be different at long *versus* short lengths. Examination of the length dependence of maximal DF, however, does not disclose such an influence. As anesthetics depressed DF at  $L_{\max}$ , so did they at all other lengths also, in proportion to the preanesthetic control initial force. In other words, if a muscle developed 75% of control force at  $L_{\max}$  when exposed to anesthetic, it would also develop the same fraction of the preanesthetic control force at any other length at the same anesthetic concentration. The same findings apply for the other variables analyzed ( $+dF/dt_{\max}$ ,  $-dF/dt_{\max}$ , TPF, and  $RT_{1/2}$ ).

Comparison between the effects of exposure to low extracellular  $[\text{Ca}^{2+}]$  and to volatile anesthetics may provide insights into mechanisms of action of anesthetics and length-tension relationships. Therefore, each muscle was exposed first to a stepwise increase in  $[\text{Ca}^{2+}]_o$  and then to increasing concentrations of anesthetic at normal  $[\text{Ca}^{2+}]_o$ . This sequence may have introduced a time effect and reduced the value of any conclusion that could be drawn from comparing the two dose-response curves. However, the unavoidable decline in muscle performance in either protocol was not statistically significantly different. The responses of every muscle were similar under both protocols. Except for TPF, reducing  $[\text{Ca}^{2+}]_o$  produced for each variable the same pattern of effects as did increasing volatile anesthetic concentration. However, upon comparison of the time course of isometric relaxation at equal twitch amplitude, values of  $RT_{1/2}$  were lower (*i.e.*, isometric relaxation was shorter) in anesthetic than in low  $[\text{Ca}^{2+}]_o$  at  $L_{\max}$ , although they did not differ between the protocols with varied  $[\text{Ca}^{2+}]_o$  and anesthetic at the much shorter lengths. These results are the only indication from this study to suggest that volatile anesthetics decrease myofibrillar  $\text{Ca}^{2+}$  responsiveness at long muscle lengths but not at short lengths. This effect is detectable most likely because comparison of time course variables at equal twitch amplitude with different inotropic interventions is more sensitive than when contractions of different amplitudes are compared.<sup>25</sup>

In some muscles,  $L_{\max}$  shifted slightly toward lower muscle lengths (98%  $L_{\max}$ ) at anesthetic concentrations greater than 1 MAC or at low  $[\text{Ca}^{2+}]_o$ . The latter phenomenon has been reported previously.<sup>29</sup> To compensate for this, the data were analyzed also after normalizing measured forces to the force measured at 98% of  $L_{\max}$  instead of  $L_{\max}$ . This modification did not affect the results.

Our current findings are in agreement with those of Komai and Rusy,<sup>30</sup> who reported that halothane reduced absolute changes in DF that accompany an increase in resting tension from 0.5 to 1.5 g/mm<sup>2</sup> in rabbit right ventricular papillary muscle stimulated at 0.1–1.0 Hz. In

this range of stimulation frequencies, halothane's effect could be compensated for by increasing the frequency of stimulation, and thus increasing calcium availability. This led to the conclusion that the extent of  $\text{Ca}^{2+}$  binding to troponin C in the presence and absence of halothane remained the same provided that  $\text{Ca}^{2+}$  availability was the same.<sup>30</sup> Our results are also in agreement with those obtained in chronically instrumented dogs by Van Trigt *et al.*<sup>31</sup> When the data from their figure 8 are recalculated and expressed relative to the maximal left ventricular (LV) end-systolic transmural pressure, one finds that this variable is affected in a constant proportion at equal LV end-systolic minor axis diameter, with or without halothane.

This study was conducted under muscle length control, without information on sarcomere length. Consequently, force development at short lengths may well have been overestimated relative to that at  $L_{\max}$  because of greater internal shortening at long than at short muscle lengths.<sup>32,33</sup> The above consideration is of little relevance to this study, however, since we compared amplitude and time courses of isometric twitches at a given length before and during drug interventions, and subsequently compared time course variables at a given muscle length at equal twitch amplitude. Furthermore, in order to preserve our preparation from early degradation, the experiments were carried out at nonphysiologic temperature and stimulation frequencies. The effect of anesthetics may be different under other, untested, conditions.

In summary, the data from this study show that in isolated intact ventricular muscle the length dependence of force generation is not significantly altered by halothane, isoflurane, and enflurane up to 1.5 MAC. These anesthetics act at any length as though less  $\text{Ca}^{2+}$  acted on the contractile apparatus, *i.e.*, as though there were a reduction of intracellular  $\text{Ca}^{2+}$  availability, possibly coupled to a decreased myofibrillar calcium responsiveness, detected only when the time course of equal amplitude twitches were compared in low  $[\text{Ca}^{2+}]_o$  *versus* in anesthetic. Such a minor effect on myofibrillar  $\text{Ca}^{2+}$  sensitivity is not surprising in view of recent studies on the intracellular  $\text{Ca}^{2+}$  transient detected in aequorin-injected ferret papillary muscles.<sup>34,35</sup>

## References

1. Allen DG, Kentish JC: The cellular basis of the length-tension relation in cardiac muscle. *J Mol Cell Cardiol* 17:821–840, 1985
2. Gordon AM, Huxley AF, Julian FJ: The variation in isometric tension with sarcomere length in vertebrate muscle fibers. *J Physiol (Lond)* 184:170–192, 1966
3. Page SG: Measurements of structural parameters in cardiac muscle, The physiological basis of Starling's Law of the Heart. *Ciba Found Symp* 24:13–25, 1974
4. Fabiato A, Fabiato F: Dependence of the contractile activation of skinned cardiac cells on the sarcomere length. *Nature* 256:54–56, 1975
5. Kentish JC, ter Keurs HEDJ, Ricciardi L, Buxx JJJ, Noble MIM:

- Comparison between the sarcomere length-force relations of intact and skinned trabeculae from rat right ventricle. *Circ Res* 58:755-768, 1986
6. Hibberd MG, Jewell BR: Calcium- and length-dependent force production in rat ventricular muscle. *J Physiol (Lond)* 329:527-540, 1982
7. Allen DG, Kurihara S: The effects of muscle length on intracellular calcium transients in mammalian cardiac muscle. *J Physiol (Lond)* 327:79-94, 1982
8. Parmley WW, Chuck L: Length-dependent changes in myocardial contractile state. *Am J Physiol* 224:1195-1199, 1973
9. Rusy BF, Komai H: Anesthetic depression of myocardial contractility: A review of possible mechanisms. *ANESTHESIOLOGY* 67:745-766, 1987
10. Blinks JR: Convenient apparatus for recording contractions of isolated heart muscle. *J Appl Physiol* 20:755-757, 1965
11. Brutsaert DL, Claes VA: Onset of mechanical activation of mammalian heart muscle in calcium- and strontium-containing solutions. *Circ Res* 35:345-357, 1974
12. Housmans PR, Murat I: Comparative effects of halothane, enflurane, and isoflurane at equipotent anesthetic concentrations on isolated ventricular myocardium of the ferret: I. Contractility. *ANESTHESIOLOGY* 69:451-463, 1988
13. Housmans PR, Murat I: Comparative effects of halothane, enflurane, and isoflurane at equipotent anesthetic concentrations on isolated ventricular myocardium of the ferret: II. Relaxation. *ANESTHESIOLOGY* 69:464-471, 1988
14. Murat I, Housmans PR: Minimum alveolar concentrations (MAC) of halothane, enflurane, and isoflurane in ferrets. *ANESTHESIOLOGY* 68:783-786, 1988
15. Winer BJ: *Statistical Principles in Experimental Design*. 2nd ed. New York, McGraw-Hill, 1971, pp 54-57
16. Allen DG, Smith GL: The first calcium transient following shortening in isolated ferret ventricular muscle. *J Physiol (Lond)* 366:83P, 1985
17. Nichols CG: The influence of "diastolic" length on the contractility of isolated cat papillary muscle. *J Physiol (Lond)* 361:269-279, 1985
18. Allen DG, Nichols CG, Smith GL: The effects of changes in muscle length during diastole on the calcium transient in ferret ventricular muscle. *J Physiol (Lond)* 406:359-370, 1985
19. Babu A, Sonnenblick E, Gulati J: Molecular basis for the influence of muscle length on myocardial performance. *Science* 240:74-76, 1988
20. Bremel RD, Weber A: Cooperation within actin filament in vertebrate skeletal muscle. *Nature [New Biology]* 238:97-101, 1972
21. Housmans PR: The relation between contraction dynamics and the intracellular calcium transient in mammalian cardiac muscle. *Starling's Law of the Heart Revisited*. Edited by ter Keurs HEDJ, Noble MIM. Boston, Kluwer Academic Publishers, 1988, pp 60-66
22. Wang J, Lee NK, Blinks JR: Starling's Law of the Heart: the stretch-induced increase in the  $Ca^{2+}$ -affinity of troponin C is the result, not the cause of increased cross-bridge attachment (abstract). *Physiologist* 32:218, 1989
23. Fabiato A: Myoplasmic free calcium concentration reached during the twitch of an intact isolated cardiac cell and during calcium-induced release of calcium from the sarcoplasmic reticulum of a skinned cardiac cell from the adult rat or rabbit ventricle. *J Gen Physiol* 78:457-497, 1981
24. Fabiato A: Personal communication, *Starling's Law of the Heart Revisited*. Edited by ter Keurs HEDJ, Noble MIM. Boston, Kluwer Academic Publishers, 1988, pp 14-17
25. Housmans PR: Negative inotropy of halogenated anesthetics in ferret ventricular myocardium. *Am J Physiol* 259:H827-H834, 1990
26. Shibata T, Blanck TJJ, Sagawa K, Hunter W: The effect of halothane, enflurane, and isoflurane on the dynamic stiffness of rabbit papillary muscle. *ANESTHESIOLOGY* 70:496-502, 1989
27. Murat I, Ventura-Clapier R, Vassort G: Halothane, enflurane, and isoflurane decrease calcium sensitivity and maximal force in detergent-treated rat cardiac fibers. *ANESTHESIOLOGY* 69:892-899, 1988
28. Murat I, Lechene P, Ventura-Clapier R: Effects of volatile anesthetics on mechanical properties of rat cardiac skinned fibers. *ANESTHESIOLOGY* 73:73-81, 1990
29. Allen DG, Jewell BR, Murray JW: The contribution of activation processes to the length-tension relation of cardiac muscle. *Nature* 248:606-607, 1974
30. Komai H, Rusy BF: Halothane modulation of myocardial force-length relationship and calcium availability (abstract). *ANESTHESIOLOGY* 71:A469, 1989
31. Van Trigt P, Christian CC, Fagraeus L, Peyton RB, Jones RN, Spray TL, Pasque MK, Pellom GL, Wechsler AS: The mechanism of halothane-induced myocardial depression. *J Thorac Cardiovasc Surg* 85:832-838, 1983
32. Donald TC, Reeves DNS, Reeves RC, Walker AA, Hefner LL: Effect of damaged ends in papillary muscle preparations. *Am J Physiol* 238:H14-H23, 1980
33. Housmans PR, Chuck LHS, Claes VA, Brutsaert DL: Nonuniformity of contraction and relaxation of mammalian cardiac muscle. *Adv Exp Med Biol* 170:837-841, 1984
34. Housmans PR: Modification of cardiac myofibrillar responsiveness to  $Ca^{2+}$  by the anesthetic halothane (abstract). *Eur Heart J* 10 (Suppl):367, 1989
35. Housmans PR, Wanek LA, Carton EG: Halothane, enflurane and isoflurane decrease myofibrillar  $Ca^{2+}$  responsiveness in intact mammalian ventricular muscle (abstract). *Biophys J* 57:554a, 1990
